# Supplementary figures and images for: How do medical students use and understand pain rating scales?
Source: publisher site journal article supplement (doi:10.1016/j.sjpain.2016.12.007), 2017-01-18

**Supplementary file: online questions to participants**


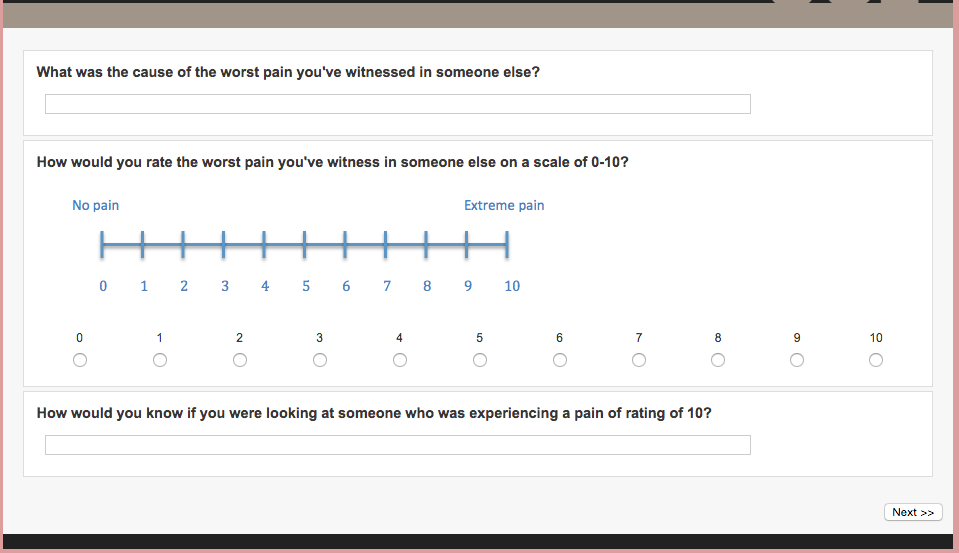

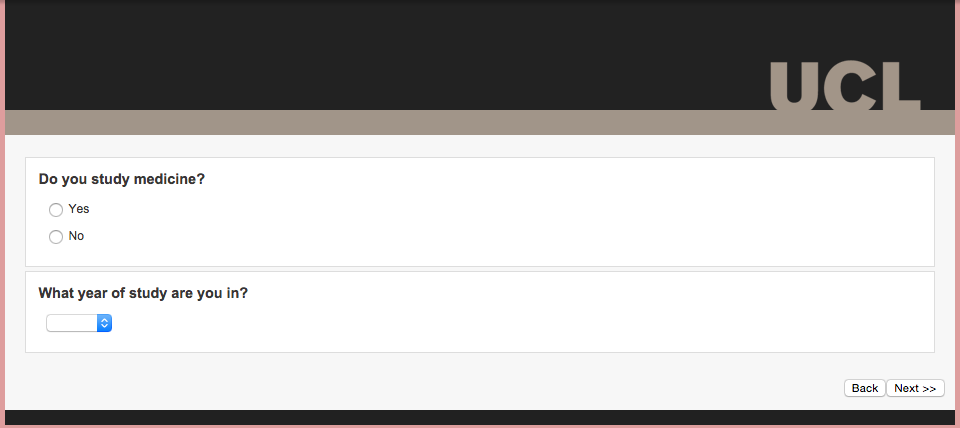


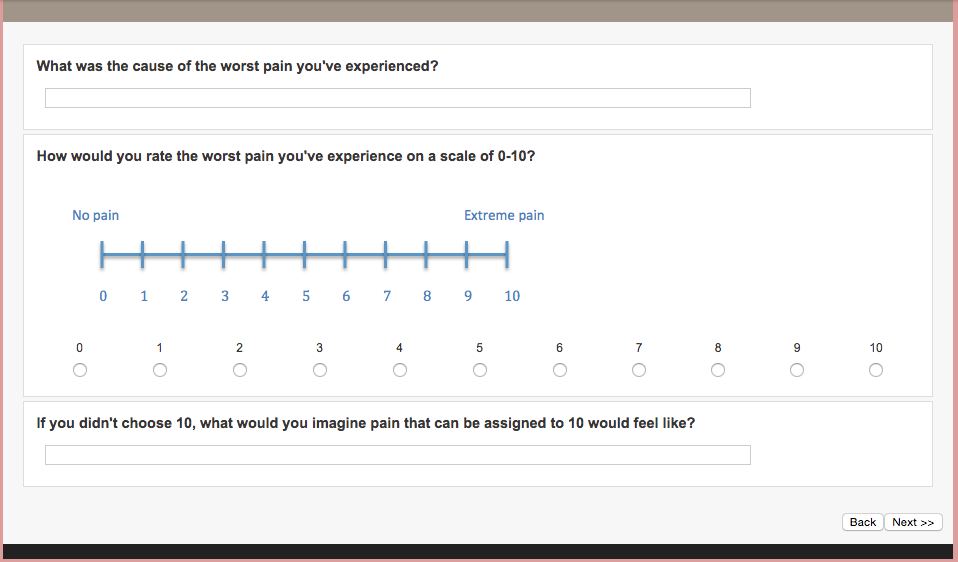


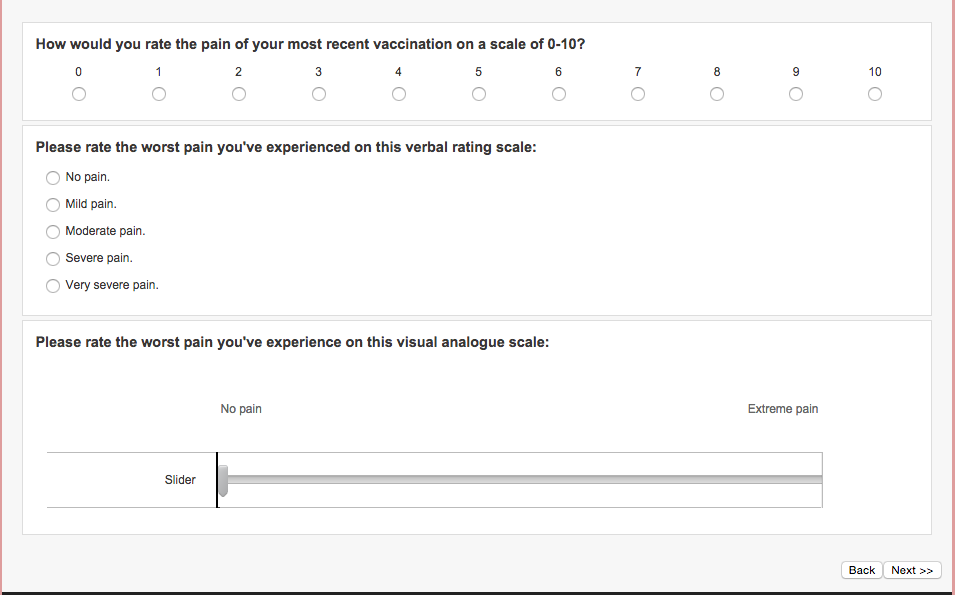


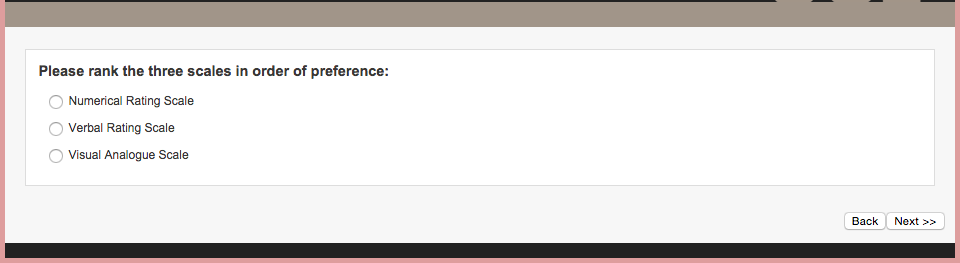


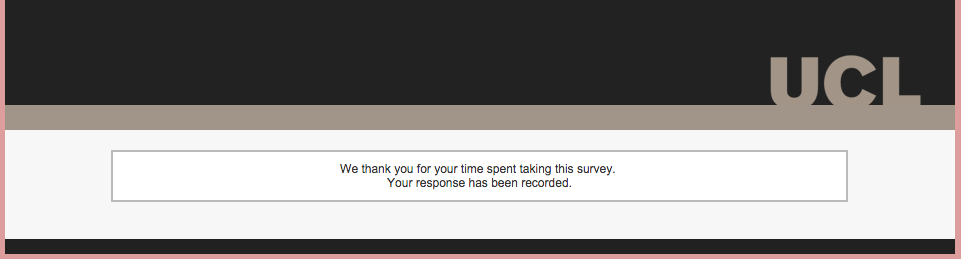

Supplement: Supplementary file 1 [file 1-s2.0-S1877886016301744-mmc1.docx]
